# Supplementary material for: Early Triassic Marine Biotic Recovery: The Predators' Perspective
Source: PLoS One. 2014 Mar 19;9(3):e88987. doi: 10.1371/journal.pone.0088987 (PMC3960099; doi:10.1371/journal.pone.0088987)
Supplement: File S1 — Table S1. Xcel-spreadsheet with maximum standard lengths of marine species of bony fishes (Actinistia, Actinopterygii) in the Early Triassic and the Anisian (Middle Triassic) based on literature data. Table S2. Xcel-spreadsheet with list of tetrapod species surveyed and accompanying occurrence and maximum size ( = total length) data. The compilation of Middle Triassic taxa is based on Kelley et al. (2012) [124] with some taxa, reference and size data modified or added. Table S3. Xcel-spreadsheet with data used for the humeral proximodistal length-body length relation in Triassic ichthyosaurs (Fig. 3). (XLSX) [file pone.0088987.s001.xlsx]

## Sheet: Tabelle1
	Appendix S1. Xcel-spreadsheet with maximal standard lengths of marine species of bony fishes (Actinistia, Actinopterygii) in the Early Triassic and the Anisian (Middle Triassic) based on literature data.
		Early Triassic				For Boxplot
	No.	Species	max. SL [mm]	Substage	References	max. SL [mm]
	1	Acrorhabdus asplundi	350-450	Smithian	Stensiö (1921)	400
	2	Acrorhabdus bertili	350-450	Smithian	Stensiö (1921)	400
	3	Acrorhabdus latistriatus	200-250	Smithian	Stensiö (1921)	225
	4	Actinistia indet.	100	?	Tong et al. (2006)	100
	5	Albertonia spp.	370	?	Neuman (1986)	370
	6	Atherstonia madagascariensis	>400	Dienerian	Takai (1976)	400
	7	Australosomus altisquamosus	310	Dienerian	Beltan (1980)	310
	8	Australosomus kochi	190	Griesbachian	Stensiö (1932), Nielsen (1936, 1949)	190
	9	Australosomus merlei	200	Dienerian	Priem (1924), Beltan (1968), Lehman (1952)	200
	10	Australosomus pholidopleuroides	170	Griesbachian	Nielsen (1949)	170
	11	Australosomus simplex	230	Griesbachian	Nielsen (1949)	230
	12	Australosomus aff. simplex	70	Griesbachian	Nielsen (1949)	70
	13	Australosomus sp.	110	?	Schaeffer & Mangus (1976)	110
	14	Australosomus sp.	100	?	Lehman et al. (1959)	100
	15	Axelia elegans	300-400	Smithian	Stensiö (1921)	350
	16	Axelia robusta	540-720	Smithian	Stensiö (1921), Forey (1998)	630
	17	Brigeria aldingeri	1500	Smithian	Stensiö (1932), Schwarz (1970)	1500
	18	Brigeria groenlandica	800	Griesbachian	Stensiö (1932), Nielsen (1936, 1949)	800
	19	Brigeria nielseni	930	Dienerian	Lehman (1952), Beltan (1977, 1980)	930
	20	Birgeria sp.	500-550	?	Berg et al. (1964), Chang & Miao (2004)	525
	21	Birgeria sp.	400	?	Schaeffer & Mangus (1976)	400
	22	Birgeria sp.	500	?	Guffroy (1956)	500
	23	Bobasatrania canadensis	1200	?	Lambe (1914, 1916), Stensiö (1921), Russell (1951), Schaeffer & Mangus (1976)	1200
	24	Bobasatrania groenlandica	>400	Griesbachian	Stensiö (1932), Nielsen (1936, 1952)	400
	25	Bobasatrania mahavavica	150	Dienerian	White (1933), Lehman (1956)	150
	26	Bobasatrania cf. mahavavica	110	Dienerian	Lehman et al. (1959)	110
	27	Bobasatrania nathorsti	>1000	Smithian	Stensiö (1921, 1932)	1000
	28	Bobasatrania sp.	200	Smithian	Stensiö (1932)	200
	29	Boreosomus arcticus	350-400	Smithian	Nielsen (1942)	375
	30	Boreosomus gillioti	120	Dienerian	Priem (1924), Nielsen (1942), Lehman (1952)	120
	31	Boreosomus piveteaui	240	Griesbachian	Stensiö (1932), Nielsen (1936, 1942)	240
	32	Boreosomus reuterskioeldi	200-250	Smithian	Stensiö (1921), Nielsen (1942)	225
	33	Boreosomus sp.	210	?	Schaeffer & Mangus (1976)	210
	34	Broughia perleididoides	200	Griesbachian	Stensiö (1932)	200
	35	Caseodus varidentis	1000-1500	?	Mutter & Neuman (2008)	1250
	36	Chaohuichthys majiashanensis	130	Spathian	Tong et al. (2006)	130
	37	Colobodus praemaximus	285	?	Corroy (1928)	285
	38	Ecrinesomus dixoni	250	Dienerian	Woodward (1910), Andersson (1916), Lehman (1956)	250
	39	Haywardia jordani	65	Dienerian	Tanner (1936), Romano et al. (2012)	65
	40	Helmolepis cyphognatha	80	Smithian	Neuman & Mutter (2005)	80
	41	Helmolepis gracilis	75	Griesbachian	Stensiö (1932), Nybelin (1977)	75
	42	Helmolepis manis	53	Dienerian	Mutter (2005)	53
	43	Homalodontus aplopagus	1200-1500	?	Mutter et al. (2007, 2008)	1350
	44	Homalodontus homalorhizo	310	?	Mutter et al. (2007, 2008)	310
	45	Icarealcyon malagasium	300	Dienerian	Beltan (1984)	300
	46	Jacobulus novus	<100	Dienerian	Lehman (1952)	100
	47	Jurongia fusiformis	140	Spathian	Liu et al. (2002)	140
	48	Lehmanotus markubai	100	Dienerian	Beltan (1968)	100
	49	Laugia groenlandica	180	Griesbachian	Stensiö (1932), Forey (1998)	180
	50	Mylacanthus lobatus	600-800	Smithian	Stensiö (1921)	700
	51	Mylacanthus spinosus	600-800	Smithian	Stensiö (1921)	700
	52	Ospia whitei	200	Griesbachian	Stensiö (1932), Nielsen (1936)	200
	53	Palaeobates polaris	1000	Smithian	Stensiö (1921), Romano & Brinkmann (2010)	1000
	54	Paracentrophorus madagascariensis	<100	Dienerian	Piveteau (1939-1940), Gardiner (1960)	100
	55	Paraperleidus changxingensis	250	?	Zhao & Lu (2007)	250
	56	Parasemionotus besairiei	80	?	Lehman et al. (1959)	80
	57	Parasemionotus labordei	110	Dienerian	Priem (1924), Lehman (1952), Beltan (1968)	110
	58	Peia jurongensis	135	Spathian	Li (2009)	135
	59	"Perleidus" stoschiensis	155	Griesbachian	Stensiö (1932), Lombardo (1995, 2001)	155
	60	"Perleidus" woodwardi	300	Smithian	Stensiö (1921), Lombardo (1995, 2001)	300
	61	"Perleidus" sp.	200-250	?	Schaeffer & Mangus (1976), Bürgin (1995), Lombardo (1995, 2001), Neuman & Mutter (2005)	225
	62	Piveteauia madagascariensis	130-140	Dienerian	Lehman (1952), Clément (1999)	135
	63	Plesioperleidus dayeensis	205	Spathian	Su & Li (1983), Jin et al. (2003), Tong et al. (2006), Jin (2006)	205
	64	Plesioperleidus jiangsuensis	125	Spathian	Qian et al. (1997)	125
	65	Plesioperleidus madagascariensis	106	Dienerian	Piveteau (1934), Lehman (1953), Beltan (1968), Jin et al. (2003)	106
	66	Plesioperleidus piveteaui	95	Dienerian	Lehman (1952), Jin et al. (2003)	95
	67	Pteronisculus aldingeri	300	Griesbachian	White & Moy-Thomas (1940), Nielsen (1942)	300
	68	Pteronisculus arambourgi	270	Dienerian	Lehman (1952)	270
	69	Pteronisculus arcticus	200	Griesbachian	Stensiö (1932), Nielsen (1936, 1942), White & Moy-Thomas (1940)	200
	70	Pteronisculus broughi	250	Dienerian	Lehman (1952)	250
	71	Pteronisculus cicatrosus	115	Dienerian	White (1933), Lehman (1952)	115
	72	Pteronisculus gunnari	250-300	Griesbachian	White & Moy-Thomas (1940), Nielsen (1942)	275
	73	Pteronisculus macropterus	315	Dienerian	White (1933), Lehman (1952)	315
	74	Pteronisculus magnus	400	Griesbachian	White & Moy-Thomas (1940), Nielsen (1942)	400
	75	Pteronisculus stensioei	190	Griesbachian	White & Moy-Thomas (1940), Nielsen (1942)	190
	76	Qingshania cercida	120	Spathian	Liu et al. (2002)	120
	77	Rhabdoderma madagascariensis	180	Dienerian	Woodward (1910), Moy-Thomas (1935), Forey (1998)	180
	78	Rebellatrix divaricerca	1300	?	Wendruff & Wilson (2012)	1300
	79	Sakamenichthys germaini	100	?	Lehman et al. (1959), Hutchinson (1973)	100
	80	Sassenia groenlandica	300	Griesbachian	Nielsen (1936), Forey (1998)	300
	81	Sassenia tuberculata	300	Smithian	Stensiö (1921)	300
	82	Saurichthys dayi	1500	?	Raymond (1925), Schaeffer & Mangus (1976)	1500
	83	Saurichthys aff. dayi	420-560	Griesbachian	Kogan (2011), Nielsen (1936)	490
	84	Saurichthys elongatus	700-900	Smithian	Stensiö (1925)	800
	85	Saurichthys cf. elongatus	300-400	Smithian	Romano et al. (2012)	350
	86	Saurichthys eximius	600-800	?	Minikh (1981, 1982)	700
	87	Saurichthys hamiltoni	900-1200	Smithian	Stensiö (1925)	1050
	88	Saurichthys madagascariensis	530	Dienerian	Piveteau (1944-1945), Lehman (1952), Rieppel (1980a)	530
	89	Saurichthys nepalensis	400-600	?	Beltan & Janvier (1978)	500
	90	Saurichthys obrutchevi	510-680	?	Minikh (1981, 1982)	595
	91	Saurichthys ornatus	1200-1600	Smithian	Stensiö (1925)	1400
	92	Saurichthys cf. ornatus	300-400	Griesbachian	Mutter et al. (2008)	350
	93	Saurichthys piveteaui	600.8	Dienerian	Beltan (1968)	700
	94	Saurichthys proximus	510-680	?	Minikh (1981, 1982)	595
	95	Saurichthys tertius	600-800	?	Minikh (1981, 1982)	700
	96	Saurichthys toxolepis	550	?	Mutter et al. (2008)	550
	97	Saurichthys wimani	750-1000	Smithian	Stensiö (1925)	875
	98	Saurichthys sp.	430-580	Dienerian	Romano et al. (2012)	505
	99	"Semionotus" alsaticus	140	?	Deecke (1889), Woodward (1895)	140
	100	Stensioenotus dongchangensis	130	Spathian	Liu et al. (2002)	130
	101	Stensioenotus intercessus	160	Dienerian	Lehman (1952)	160
	102	Suius brevis	120	Spathian	Liu et al. (2002)	120
	103	Suius cf. brevis	90	Spathian	Tong et al. (2006)	90
	104	Thomasinotus divisus	120	Dienerian	Lehman (1952), Beltan (1968)	120
	105	Thomasinotus sp.	50	?	Lehman et al. (1959)	50
	106	Watsonulus eugnathoides	160	Dienerian	Piveteau (1934), White & Moythomas (1941)	160
	107	Whiteia nielseni	240	Griesbachian	Nielsen (1936), Forey (1998)	240
	108	Whiteia tuberculata	120	Dienerian	Moy-Thomas (1935), Lehman (1952)	120
	109	Whiteia woodwardi	240	Dienerian	Priem (1924), Moy-Thomas (1935), Lehman (1952), Forey (1998)	240
	110	Whiteia sp.	1000	?	Gardiner (1966), Schaeffer & Mangus (1976), Forey (1998)	1000
	111	Wimania sinuosa	600-800	Smithian	Stensiö (1921)	700
		Anisian				For Boxplot
	No.	Species	max. SL [mm]		Additional references	max. SL [mm]
	1	Acronemus tuberculatus	300-350		Bassani (1886), Rieppel (1982)	325
	2	Actinistia indet.	100		Gall et al. (1974), Gall & Grauvogel-Stamm (2005)	100
	3	Aetheodontus besanensis	65		Brough (1939), Bürgin (1992)	65
	4	Altisolepis bellipinnis	62		Bürgin (1992), Herzog (2001), Mutter & Herzog (2004)	62
	5	Altisolepis elongignathus	65		Bürgin (1992), Mutter & Herzog (2004)	65
	6	Besania micrognathus	31		Brough (1939), Herzog & Bürgin (2005)	31
	7	Brigeria mougeoti	1000-1200		Stensiö (1919)	1100
	8	Brigeria stensioei	1500		Schwarz (1970), Romano & Brinkmann (2009)	1500
	9	Bobasatrania ceresiensis	150-200		Bürgin (1992)	175
	10	Cephaloxenus macropterus	100		Brough (1939), Bürgin (1992)	100
	11	Cephaloxenus squamiserratus	100		Bürgin (1992)	100
	12	Cleithrolepis major	120		Gardiner (1988)	120
	13	Colobodus angulalepis	500-550		Mutter (2002)	525
	14	Colobodus baii	330		Sun et al. (2008)	330
	15	Colobodus bassanii	>500		Alessandri (1910), Mutter (2001, 2004)	500
	16	Colobodus cyclolepis	480		Mutter (2002)	480
	17	Colobodus dealessandrii	260		Mutter (2002)	260
	18	Colobodus koenigi	350		Stolley (1920), Mutter (2004)	350
	19	Colobodus stensioei	570		Mutter (2002)	570
	20	Colobodus stolleyi	<300		Mutter (2002)	300
	21	Crenilepis divaricatus	640		Mutter (2002)	640
	22	Crenilepis sandbergeri	600		Dames (1888), Mutter (2004)	600
	23	Ctenognathichthys bellottii	180		Alessandri (1910), Bürgin (1992), Tintori (1998)	180
	24	Dactylolepis gogolinensis	180		Kunisch (1885), Dames (1888), Mutter (2002)	180
	25	"Dictyopyge" rhenana	110		Deecke (1889), Woodward (1895)	110
	26	Dipteronotus aculeatus	80		Jörg (1969), Gall et al. (1974), Gall & Grauvogel-Stamm (2005)	80
	27	Dollopterus brunsvicensis	170		Stolley (1920)	170
	28	Dollopterus subserratus	170		Stolley (1920)	170
	29	Dollopterus volitans	150		Compter (1891), Abel (1906), Müller (1969)	150
	30	Dorsolepis virgatus	30		Jörg (1969), Gall et al. (1974), Gall & Grauvogel-Stamm (2005)	30
	31	Engycolobodus letticus	126		Oertle (1928), Mutter (2002, 2004)	126
	32	Engycolobodus sp.	>92		Oertle (1927)	92
	33	Eoeugnathus megalepis	105		Brough (1939)	105
	34	Eosemionotus voegeli	45		Schultze & Möller (1986)	45
	35	Eosemionotus cf. voegeli	38		Oosterink (1986)	38
	36	Eosemionotus sp.	60		Hitij et al. (2010)	60
	37	Eosemionotus ceresiensis	60		Bürgin (2004)	60
	38	Gracilignathichthys microlepis	150		Bürgin (1992)	150
	39	Gymnoichthys inopinatus	110		Tintori et al. (2010)	110
	40	Gyrolepis agassizi	70		Dames (1888)	70
	41	Gyrolepis albertii	210		Dames (1888), Stolley (1920), Oertle (1928), Frickhinger (1991)	210
	42	Gyrolepis ornatus	155		Dames (1888), Stolley (1920)	155
	43	Gyrolepis sp.	320		Bürgin (1992)	320
	44	Habroichthys broughi	30		Lin et al. (2011)	30
	45	Habroichthys griffithi	43		Bürgin (1992)	43
	46	Habroichthys minimus	27		Brough (1939), Bürgin (1992)	28
	47	Habroichthys sp.	20		Hitij et al. (2010)	20
	48	Heptanema paradoxa	250		Bellotti (1857), Deecke (1889), De Alessandri (1910)	250
	49	Kyphosichthys grandei	76		Xu & Wu (2012)	76
	50	Luganoia lepidosteoides	51		Brough (1939), Bürgin (1992)	51
	51	Luopingcoelacanthus eurylacrimalis	230		Wen et al. (2013)	230
	52	Luopingichthys bergi	104		Sun et al. (2009)	104
	53	Luoxiongichthys hyperdorsalis	175		Wen et al. (2012)	175
	54	Marcopoloichthys andreetti	36		Tintori et al. (2008)	36
	55	Marcopoloichthys ani	35		Tintori et al. (2008)	35
	56	Marcopoloichthys sp.	27		Bürgin (1999), Tintori et al. (2008), Furrer (2009)	27
	57	Meridensia meridensis	100		Bürgin (1992)	100
	58	Nannolepis sp.	38		Bürgin (1992)	38
	59	Ophiopsis? lepturus	60		Bellotti (1857), Deecke (1889), Woodward (1895), Tintori & Lombardo (1999)	60
	60	Peltoperleidus macrodontus	42		Bürgin (1992), Mutter & Herzog (2004)	42
	61	Peltoperleidus triseries	40		Bürgin (1992), Mutter & Herzog (2004)	40
	62	Peltopleurus lissocephalus	55		Brough (1939), Bürgin (1992)	55
	63	Peltopleurus nothocephalus	37		Bürgin (1992), Tintori (1998)	37
	64	Peltopleurus rugosus	50		Brough (1939), Bürgin (1992)	50
	65	Peltopleurus splendens	55		Kner (1866), Bassani (1886)	55
	66	Peltopleurus sp.	23		Bürgin (1992)	23
	67	Pericentrophorus minimus	40		Jörg (1969), Gall et al. (1974), Gall & Grauvogel-Stamm (2005)	40
	68	Peripeltopleurus besanensis	60		Bürgin (1992)	60
	69	Peripeltopleurus hypsisomus	70		Bürgin (1992)	70
	70	Peripeltopleurus vexillipinnis	60		Bürgin (1992)	60
	71	Perleidus altolepis	130		Deecke (1889), Bürgin (1992), Lombardo (1995, 2001), Tintori & Lombardo (1999)	130
	72	Perleidus sinensis	60		Lombardo et al. (2011)	60
	73	"Pholidophorus" sp.	50		Oosterink (1986)	50
	74	Pholidopleurus ticinensis	100		Bürgin (1992)	100
	75	Placopleurus besanensis	50		Bassani (1886), Brough (1939)	50
	76	Placopleurus primus	42		Brough (1939)	42
	77	Placopleurus sp.	25		Hitij et al. (2010)	25
	78	Platysiagum minus	70		Brough (1939), Bürgin (1992)	70
	79	Ptycholepis barboi	150		Bassani (1886), Brough (1939), Bürgin (1992)	150
	80	Ptycholepis magnus	430		Bürgin (1992)	430
	81	Ptycholepis priscus	230		Bürgin (1992)	230
	82	Ptycholepis schaefferi	300		Bürgin (1992)	300
	83	Pygopterus crecelii	165		Wilser (1923)	165
	84	Sangiorgioichthys sui	124		López-Arbarello et al. (2011)	124
	85	Saurichthys costasquamosus	830		Alessandri (1910), Bellotti (1873), Rieppel (1985, 1992), Tintori & Lombardo (1999)	830
	86	Saurichthys curionii	465		Bellotti (1857), Griffith (1959), Rieppel (1985, 1992)	465
	87	Saurichthys daubreei	50		Firtion (1934), Gall et al. (1974)	50
	88	Saurichthys dawaziensis	380		Wu et al. (2009)	380
	89	Saurichthys latifrons	600-800		Eck (1865), Frech (1903-1908)	700
	90	Saurichthys lepidosteoides	660-880		Eck (1865), Frech (1903-1908)	770
	91	Saurichthys macrocephalus	570		Deecke (1889), Alessandri (1910), Rieppel (1985, 1992), Tintori & Lombardo (1999)	570
	92	Saurichthys paucitrichus	210-260		Rieppel (1992)	235
	93	Saurichthys tenuirostris	18-24		Münster (1839), Reis (1892)	21
	94	Saurichthys “tenuirostris”	345-460		Oosterink (1986)	403
	95	Saurichthys yunnanensis	400		Zhang et al. (2010)	400
	96	Saurichthys sp.	<100		Bashkuev et al. (2012), Romano et al. (2012)	100
	97	Saurichthys sp.	160-210		Hilzheimer (1930)	185
	98	Saurichthys sp.	83		Oosterink (1986)	83
	99	Saurichthys sp.	200-300		Schultze & Möller (1986)	250
	100	Saurichthys sp.	200-240		Sander et al. (1994)	220
	101	Saurichthys sp.	150-200		Hitij et al. (2010)	175
	102	"Sinosaurichthys" longipectoralis	>562		Wu et al. (2011)	562
	103	"Sinosaurichthys" longimedialis	453		Wu et al. (2011)	453
	104	"Sinosaurichthys" minuta	208		Wu et al. (2011)	208
	105	Stoppania ornata	400		Bürgin (1992), Lombardo et al. (2008)	400
	106	Ticinepomis peyeri	180		Rieppel (1980b)	180
	107	Ticinocolobodus macrodentatus	370		Mutter (2002)	370

## Sheet: Tabelle2
	Appendix S2. Xcel-spreadsheet with list of Early and Middle Triassic tetrapod species surveyed and accompanying occurrence and maximum size (= total length) data. The compilation of Middle Triassic taxa is based on Kelley et al. (2012) with some taxa, reference and size data modified or added.
	EARLY TRIASSIC RECORD										FOR BOXPLOT
	No.	Temnospondyli (mainly Trematosauroidea)	Horizon	First Occurrence	Country/Region	Selected Additional References	Maximum length estimates or total size [mm]				No.	Temnospondyli (mainly Trematosauroidea)	First Occurrence	For Boxplot [mm]
	1	Aphaneramma kokeni (Huene, 1920)	Mittiwali Member, Mianwali Formation, Induan, Lower Triassic	Dienerian/Smithian?	Pakistan	Welles, 1993; Schoch & Milner, 2000	not enough data				1	Chaohusaurus geishanensis Young & Dong, 1972	Spathian	740
	2	Aphaneramma rostratum Woodward, 1904	"Fish niveau", Lusitaniadalen Member, Vikinghøgda Formation	Smithian	Svalbard	Cox & Smith, 1973; Schoch & Milner, 2000	not enough data				2	Chaohusaurus zhangjiawanensis Chen, Sander, Cheng & Wang, 2013	Spathian/Anisian?	630
	3	Edingerella madagascariensis (Lehman, 1961)	Middle Sakamena Group, neighbourhood of Anaborano, Ankitokazo basin	Lowermost Olenekian	Madagascar	Maganuco et al., 2009; Steyer et al., 2010	ca. 600 (based on outline drawings in Steyer et al., 2010; correspond also with estimates based on Paracyclotosaurus davidi in Watson, 1958)				3	Corosaurus alcovensis Case, 1936	Spathian	1650
	4	Luzocephalus johannsoni (Säve-Söderbergh, 1935)	Wordie Creek Formation	mainly Griesbachian	Greenland	Shishkin, 1980; Schoch & Milner, 2000	not enough data				4	Edingerella madagascariensis (Lehman, 1961)	Lowermost Olenekian	600
	5	Luzocephalus kochi (Säve-Söderbergh, 1935)	Wordie Creek Formation	mainly Griesbachian	Greenland	Shishkin, 1980; Schoch & Milner, 2000	not enough data				5	Hupehsuchus nanchangensis Young & Dong, 1972	Spathian/Anisian?	730
	6	Lyrocephaliscus euri (Wiman, 1913)	"Fish niveau", Lusitaniadalen Member, Vikinghøgda Formation	Smithian	Svalbard	Kuhn, 1961; Cox & Smith, 1973; Schoch & Milner, 2000	not enough data				6	Ichthyopterygia indet. (new giant humerus)	early Spathian	11000
	7	Peltostega erici Wiman, 1916	"Fish niveau", Lusitaniadalen Member, Vikinghøgda Formation	Smithian	Svalbard	Cox & Smith, 1973; Schoch & Milner, 2000	not enough data				7	Keichousaurus yuananensis Young, 1965	Spathian/Anisian?	217
	8	Platystega depressa Wiman, 1914	"Fish niveau", Lusitaniadalen Member, Vikinghøgda Formation	Smithian	Svalbard	Cox & Smith, 1973; Schoch & Milner, 2000	not enough data				8	Nanchangosaurus suni Wang, 1959	Spathian/Anisian?	350
	9	Sassenisaurus spitzbergensis (Wiman, 1914)	Wordie Creek Formation	mainly Griesbachian	Greenland	Nilsson, 1942; Schoch & Milner, 2000	not enough data				9	Neodiapsida indet. (yet undescribed new material)	Spathian	1400
	10	Stoschiosaurus nielseni Säve-Söderbergh, 1935	Wordie Creek Formation	mainly Griesbachian	Greenland	Schoch & Milner, 2000	not enough data				10	Utatsusaurus hataii Shikama, Kamei & Murata, 1978	Spathian	2600
	11	Svalbardosaurus crassidens Mazin, 1981	"Grippia niveau", base of Vendomdalen Member, Vikinghøgda Formation	Spathian	Svalbard	Wiman, 1910a; Cox & Smith, 1973; Schoch & Milner, 2003	not enough data				11	Wantzosaurus elongatus Lehman, 1961	Griesbachian	1500
	12	Tertrema acuta Wiman, 1914	"Fish niveau", Lusitaniadalen Member, Vikinghøgda Formation	Smithian	Svalbard	Cox & Smith, 1973; Schoch & Milner, 2003	not enough data
	13	Wantzosaurus elongatus Lehman, 1961	Middle Sakamena Formation	Griesbachian	Madagascar	Watson, 1958 Steyer, 2002	ca. 1500 (scaled in comparison with capitosauroid Paracyclotosaurus davidi in Watson, 1958)				MIDDLE TRIASSIC RECORD
	14	Wetlugasaurus groenlandicus Säve-Söderbergh, 1935	Wordie Creek Formation	mainly Griesbachian	Greenland	Schoch & Milner, 2000	not enough data				No.	Sauropterygia	First Occurrence	For Boxplot [mm]
	No.	Sauropterygia	Horizon	First Occurrence	Country/Region	Selected Additional References	Maximum length estimates or total size [mm]				1	Anshunsaurus wushaensis Rieppel, Liu & Li, 2006	Ladinian (Longobardian)	2600
	15	Sauropterygia indet.	lower Röt Formation (=upper Buntsandstein)	Spathian	Germany	Rieppel & Hagdorn, 1997; Rieppel, 2000	not enough data				2	Askeptosaurus italicus Nopsca, 1925	Ladinian (Fassanian)	3000
	16	Sauropterygia (yet undescribed new material)	Middle-Upper Member of the Nanlinghu Formation	Spathian	China	Jiang et al., 2012	not enough data				3	Besanosaurus leptorhynchus Dal Sasso & Pinna, 1996	Anisian (Illyrian)	4330
	17	Corosaurus alcovensis Case, 1936	Alcova Sandstone Member, Chugwater Formation	Spathian	USA	Storrs, 1991; Rieppel, 1998a	1650 (up to 4000 based on isolated material)				4	Ceresiosaurus calcagnii	Ladinian (Fassanian)	2470
	18	Keichousaurus yuananensis Young, 1965	Jialingjiang Formation	Spathian/Anisian?	China	Li et al., 2002; Jiang et al., 2012	217 (as preserved holotype IVPP V 2799 shown in Young, 1965; head and most part of neck and tail missing)				5	Ceresiosaurus lanzi	Ladinian (Fassanian)	1820
	19	Hanosaurus hupehensis Young, 1972	Jialingjiang Formation	Spathian/Anisian?	China	Rieppel, 1998b; Li et al., 2002; Jiang et al., 2012	not enough data				6	Clarazia schinzi Peyer, 1936	Anisian/Ladinian (Illyrian/Fassanian)	1000
	20	Kwangsisaurus orientalis Young, 1959	Beisi Formation	Spathian	China	Rieppel, 1999; Rieppel, 2000	not enough data				7	Cyamodus hildegardis	Ladinian (Fassanian)	1160
	No.	Thalattosauriformes	Horizon	First Occurrence	Country/Region	Selected Additional References	Maximum length estimates or total size [mm]				8	Cymbospondylus buchseri Sander, 1989	Anisian (Illyrian)	5000
	21	Agkistrognathus campbelli Nicholls & Brinkman, 1993	"cirque D", Sulphur Mountain Formation	Spathian/Anisian?		Bardet, 1995; Kelley et al., 2012	not enough data				9	Cymbospondylus piscosus Leidy, 1868	Anisian (Illyrian)	9300
	22	Paralonectes merriami Nicholls & Brinkman, 1993	"cirque D", Sulphur Mountain Formation	Spathian/Anisian?		Bardet, 1995; Kelley et al., 2012	not enough data				10	Dactylosaurus gracilis	Anisian (Aegean)	390
	No.	Ichthyopterygia	Horizon	First Occurrence	Country/Region	Selected Additional References	Maximum length estimates or total size [mm]				11	Diandongosaurus acutidentatus Shang, Wu & Li, 2011	Anisian (Pelsonian)	340
	23	Ichthyopterygia indet.	Vega-Phroso siltstone member, Sulphur Mountain Formation	Smithian/Spathian	Canada	Callaway & Brinkman, 1989; Brinkman et al., 1992; Nicholls & Brinkman, 1995; Motani, 1998	not enough data				12	Dianopachysaurus dingi	Anisian (Pelsonian)	140
	24	Grippia longirostris Wiman, 1929	"Grippia niveau", base of Vendomdalen Member, Vikinghøgda Formation	Spathian	Svalbard	McGowan & Motani, 2003; Maxwell & Kear, 2013	not enough data				13	Dinocephalosaurus orientalis Li, 2003	Anisian (Pelsonian)	2700
	25	Isfjordosaurus minor (Wiman, 1910)	“lower saurian niveau”, Vendomdalen Member, Vikinghøgda Formation	Spathian	Svalbard	Wiman, 1910b; McGowan & Motani, 2003; ; Maxwell & Kear, 2013	not enough data				14	Glyphoderma kangi	Ladinian (Longobardian)	870
	26	Omphalosaurus nettarhynchus Mazin & Bucher, 1987	Lower Member, Prida Formation	late Spathian	USA	Motani, 2000; Sander & Faber, 2003	not enough data				15	Helveticosaurus zollingeri Peyer, 1955	Anisian/Ladinian (Illyrian/Fassanian)	2000
	27	Pessopteryx nisseri Wiman, 1910	“lower saurian niveau”, Vendomdalen Member, Vikinghøgda Formation	Spathian	Svalbard	Maisch, 2010; Maxwell & Kear, 2013	not enough data				16	Keichousaurus hui	Ladinian (Longobardian)	350
	28	Thaisaurus chonglakmanii Mazin, Suteethorn, Buffetaut, Jaeger & Helmcke-Ingavat, 1991	unknown horizon, Triassic	Lower Triassic?	Thailand	McGowan & Motani, 2003	not enough data				17	Largocephalosaurus qianensis Li, Jiang, Cheng, Wu & Rieppel, 2013	Anisian (Pelsonian)	2320
	29	Utatsusaurus hataii Shikama, Kamei & Murata, 1978	Osawa Formation	Spathian	Japan	Motani et al., 1998; McGowan & Motani, 2003	2600				18	Lariosaurus balsami	Ladinian (Longobardian)	870
	30	Utatsusaurus sp.	Sulphur Mountain Formation	Spathian	Canada	Nicholls & Brinkman, 1993b	Nicholls & Brinkman, 1993b				19	Lariosaurus buzzii Tschanz, 1989	Ladinian (Fassanian)	1000
	31	Chaohusaurus geishanensis Young & Dong, 1972	Middle-Upper Member of the Nanlinghu Formation; Qinglong Formation	Spathian	China	Motani & You, 1998; Motani et al., 1996; McGowan & Motani 2003	740				20	Lariosaurus hongguoensis	Anisian (Pelsonian)	580
	32	Chaohusaurus zhangjiawanensis Chen, Sander, Cheng & Wang, 2013	Jialingjiang Formation (N. homeri-N. triangularis conodont zone)	Spathian/Anisian?	China	Chen et al., 2013	630 (as preserved)				21	Lariosaurus valceresii Tintori & Renesto, 1990	Ladinian (Longobardian)	900
	33	Parvinatator wapitiensis Nicholls & Brinkman, 1995	"cirque D", ?Vega Phroso member, Sulphur Mountain Formation	Spathian/Anisian?	Canada	McGowan & Motani, 2003	not enough data				22	Lariosaurus xingyiensis	Ladinian (Longobardian)	1800
	34	Quasianosteosaurus vikinghoegdai Maisch & Matzke, 2003	"Grippia niveau", base of Vendomdalen Member, Vikinghøgda Formation	Spathian	Svalbard	Maisch & Matzke, 2003; Maxwell & Kear, 2013	not enough data				23	Mixosaurus cornalianus (Bassani, 1886)	Anisian (Illyrian)	980
	35	Ichthyopterygia indet.	“lower saurian niveau”, Vendomdalen Member, Vikinghøgda Formation	Spathian	Svalbard	Maxwell & Kear, 2013	not enough data				24	Mixosaurus panxianensis Jiang, Schmitz, Hao & Sun, 2006	Anisian (Pelsonian)	728
	36	Omphalosaurus merriami Maisch, 2010	“lower saurian niveau”, Vendomdalen Member, Vikinghøgda Formation	Spathian	Svalbard	Maxwell & Kear, 2013	not enough data				25	Neusticosaurus edwardsii	Ladinian (Fassanian)	1200
	37	Cymbospondylus Leidy, 1868	shales below the Platy Siltstone Member, Thaynes Formation	Smithian/early Spathian?	USA	Massare & Callaway, 1994; Maxwell & Kear, 2013	not enough data				26	Neusticosaurus peyeri	Ladinian (Fassanian)	500
	38	Ichthyopterygia indet. (new giant humerus)	Columbites parisianus Zone, Thaynes Formation	early Spathian	USA	this paper	11000 (estimated, see Fig. 3 in main article)				27	Neusticosaurus pusillus	Ladinian (Fassanian)	460
	39	Gulosaurus helmi Cuthbertson, Russell & Anderson, 2013	Vega-Phroso siltstone member, Sulphur Mountain Formation	Smithian/Spathian	Canada	Brinkman et al., 1992; Motani, 1997	not enough data (only skull and anterior part of trunk preserved, ca 270 in length)				28	Neusticosaurus staubi	Ladinian (Longobardian)	500
	No.	Hupehsuchia	Horizon	First Occurrence	Country/Region	Selected Additional References	Maximum length estimates or total size [mm]				29	Nothosaurus giganteus	Anisian (Illyrian)	3850
	40	Hupehsuchus nanchangensis Young & Dong, 1972	Jialingjiang Formation	Spathian/Anisian?	China	Carroll & Dong, 1991; Li et al., 2002; Jiang et al., 2012	730 (up to 1000, TMS pers. obs.)				30	Nothosaurus jagisteus Rieppel, 2001	Ladinian (Fassanian)	920
	41	Nanchangosaurus suni Wang, 1959	Daye Formation	Spathian/Anisian?	China	Wang, Carroll & Dong, 1991; Wu et al., 2003; Jiang et al., 2012	350				31	Nothosaurus rostellatus Shang, 2006	Anisian (Pelsonian)	1020
	No.	Archosauromorpha	Horizon	First Occurrence	Country/Region	Selected Additional References	Maximum length estimates or total size [mm]				32	Nothosaurus youngi Li & Rieppel, 2004	Ladinian (Longobardian)	650
	42	Augustaburiania vatagini Sennikov, 2011	Yarengian superhorizon, Gamian horizon, Lipovskaya Formation	Spathian	Russia	Kelley et al., 2012	not enough data				33	Paraplacodus broilii Peyer, 1931	Ladinian	1400
	No.	Neodiapsida	Horizon	First Occurrence	Country/Region	Selected Additional References	Maximum length estimates or total size [mm]				34	Pararcus diepenbroeki Klein & Scheyer, 2013	Anisian (Bithynian/Pelsonian)	1350
	43	Neodiapsida indet. (yet undescribed new material)	Middle-Upper Member of the Nanlinghu Formation	Spathian	China	Jiang et al., 2012	1400				35	Phalarodon atavus (Quenstedt, 1852)	Anisian (Pelsonian)	500
											36	Phalarodon callawayi Schmitz, Sander, Storrs & Rieppel, 2004	Anisian (Illyrian)	1500
											37	Phalarodon fraasi Merriam, 1910	Anisian (Pelsonian)	2800
											38	Phantomasaurus neubigi (Sander, 1997)	Anisian (Illyrian)	3000
											39	Pistosaurus longaevus Meyer, 1839	Anisian (Illyrian)	2080
											40	Placodus gigas Agassiz, 1833	Anisian (Bithynian)	2500
	MIDDLE TRIASSIC RECORD										41	Placodus inexpectatus Jiang, Motani, Hao, Rieppel, Sun, Schmitz & Sun, 2008	Anisian (Pelsonian)	2050
	No.	Sauropterygia	Horizon	First Occurrence	Country/Region	Selected Additional References	Maximum length estimates or total size [mm]				42	Qianosuchus mixtus Li, Wu, Cheng, Sato & Wang, 2006	Anisian (Pelsonian)	3000
	1	Anarosaurus heterodontus Rieppel & Lin, 1995	Jena Formation, Vossenveld Formation	Anisian (Bithynian)	Germany/ The Netherlands	Rieppel, 2000; Klein, 2012	not enough data (>300 preserved)				43	Qianxisaurus chajiangensis Cheng, Wu, Sato & Shan, 2012	Ladinian (Longobardian)	760
	2	Anarosaurus pumilio Dames, 1890	Karlstadt Formation, base of Middle Muschelkalk	Anisian (Illyrian)	Germany	Rieppel, 2000; Klein, 2009	not enough data				44	Sanchiaosaurus dengi Young, 1965	Anisian (Aegean?)	700
	3	Augustasaurus hagdorni Sander, Rieppel & Bucher, 1997	Fossil Hill Member, Favret Formation	Anisian (Illyrian)	Nevada, USA	Sander et al., 1997; Rieppel, 2000	not enough data (>1000 preserved)				45	Serpianosaurus mirigiolensis Rieppel, 1989	Anisian/Ladinian (Illyrian/Fassanian)	750
	4	Ceresiosaurus calcagnii Peyer, 1931	Cava Inferiore beds, lower Meridekalk	Ladinian (Fassanian)	Italy, Switzerland	Peyer, 1931a; Rieppel, 2000; Hänni, 2004	2470 (PIMUZ T 4836)				46	Simosaurus gaillardoti Meyer, 1842	Ladinian (Fassanian)	3500
	5	Ceresiosaurus lanzi Hänni, 2004	Cassina Beds	Ladinian (Fassanian)	Italy, Switzerland	Hänni, 2004	1820 (PIMUZ T 2464, holotype)				47	Tanystropheus longobardicus Bassani, 1886	Anisian/Ladinian (Illyrian/Fassanian/Longobardian)	4200
	6	Chinchenia sungi Young, 1965	Lower Member (Member I) Guanling Formation	Anisian (Aegean?)	China	Rieppel, 1999, 2000	not enough data				48	Thalattoarchon saurophagis Fröbisch, Fröbisch, Sander, Schmitz & Rieppel, 2013	Anisian (Pelsonian)	8600
	7	Cyamodus hildegardis Peyer, 1931	middle and upper Besano Formation	Ladinian (Fassanian)	Italy, Switzerland	Peyer, 1931b; Rieppel, 2000; Scheyer, 2010	1160 (as preserved, holotype PIMUZ T4763)				49	Wumengosaurus delicatomandibularis Jiang, Rieppel, Motani, Hao, Sun, Schmitz & Sun, 2008	Anisian (Pelsonian)	960
	8	Cyamodus kuhnschnyderi Nosotti & Pinna, 1993	Meissner Formation, Uppermost Muschelkalk	Anisian (Illyrian)	Germany	Rieppel, 2000	not enough data				50	Xinminosaurus catactes Jiang, Motani, Hao, Schmitz, Rieppel, Sun & Sun, 2008	Anisian (Pelsonian)	2320
	9	Cyamodus muensteri (Agassiz, 1839)	lower Meissner Formation, Upper Muschlkalk	Anisian (Illyrian)	Germany	Rieppel, 2000	not enough data				51	Yunguisaurus liae Cheng, Sato, Wu and Li, 2006	Ladinian (Longobardian)	4016
	10	Cyamodus rostratus (Münster, 1839)	lower Meissner Formation, Upper Muschlkalk	Anisian (Illyrian)	Germany	Rieppel, 2000	not enough data
	11	Cymatosaurus fridericianus Fritsch, 1894	Upper Rot Formation, Lowermost Muschelkalk mu1 (Gogolin Formation)	Anisian (Aegean)	Germany, Poland	Rieppel, 2000	not enough data
	12	Cymatosaurus latifrons (Gürich, 1884)	Upper Buntsandstein, upper Rot Formation, lower Muschelkalk	Anisian (Aegean)	Poland	Rieppel, 2000	not enough data
	13	Cymatosaurus minor Rieppel & Werneburg, 1998	Lower Muschelkalk, Jena Formation	Anisian (Aegean)	Germany	Rieppel, 2000	not enough data
	14	Cymatosaurus multidentatus (Huene, 1958)	6 meters above the base of Anisian	Anisian (Aegean)	Austria	Rieppel, 2000	not enough data
	15	Dactylosaurus gracilis Gürich, 1884	Lowermost Muschelkalk, Gogolin Formation	Anisian (Aegean)	Poland	Rieppel, 2000; Sues & Carroll, 1985	390 (as preserved, holotype of D. schroederi)
	16	Diandongosaurus acutidentatus Shang, Wu & Li, 2011	Member II of the Guanling Formation	Anisian (Pelsonian)	China	Shang et al., 2011; Sato et al., 2013a	340 (NMNS-000933-F03498, posteriormost tip of tail missing)
	17	Dianopachysaurus dingi Liu, Rieppel, Jiang, Aitchison, Motani, Zhang, Zhou & Sun, 2011	Member II Guangling Formation	Anisian (Pelsonian)	China	Liu et al., 2011	140 (as preserved, tail is largely missing)
	18	Germanosaurus schafferi (Arthaber, 1924)	Lower Muschelkalk Gogolin beds	Anisian (Aegean)	Poland	Rieppel, 1997; Rieppel, 2000	not enough data
	19	Glyphoderma kangi Zhao, Li, Liu & He, 2008	Zhuganpo Member of Falang Formation	Ladinian (Longobardian)	China	Zhao et al., 2008	870
	20	Keichousaurus hui Young, 1958	Zhuganpo Member of Falang Formation	Ladinian (Longobardian)	China	Rieppel, 2000	350 (TMS pers. obs.)
	21	Lariosaurus balsami Curioni, 1847	Perledo Member of the Perldeo-Varenna Formation; Middle sub-unit of Alcover unit	Ladinian (Longobardian)	Italy, Spain	Kuhn-Schnyder, 1987: Rieppel, 1998c; Rieppel, 2000	870 neotype of L. balsami, BSP AS I 802); 62 (original of Mariani, 1923, complete specimen with tail tip missing)
	22	Lariosaurus buzzii Tschanz, 1989	Besano Formation	Ladinian (Fassanian)	Italy, Switzerland	Tschanz, 1989; Rieppel, 2000	ca. 1000 (estimate given by Tschanz, 1989)
	23	Lariosaurus curionii Rieppel, 1998	Black calcareous shales of Amelie-les-bains	Ladinian	France	Rieppel, 2000	not enough data
	24	Lariosaurus hongguoensis Jiang, Maisch, Sun, Sun & Hao, 2006	Lower Reptile Bed, Upper Member of Guanling Formation	Anisian (Pelsonian)	China	Jiang et al., 2006a	580 (as preserved, length of holotype GMPKU-P-1011 given by Jiang et al., 2006a)
	25	Lariosaurus stensioei (Haas, 1963)	Lower Member of the Saharonim Formation	Anisian/Ladinian (Illyrian/Fassanian)	Israel	Rieppel, 2000; Rieppel et al., 1999	not enough data
	26	Lariosaurus valceresii Tintori & Renesto, 1990	Kalkschieferzone, upper Meridekalk	Ladinian (Longobardian)	Italy	Renesto et al., 2004	900 (only very tip of tail missing in holotype)
	27	Lariosaurus xingyiensis Li, Liu & Rieppel, 2002	Zhuganpo Member of the Falang Formation	Ladinian (Longobardian)	China	Li et al., 2002	1800 (preserved, measured on image)
	28	Neusticosaurus edwardsii (Cornalia, 1854)	Lower Meride Limestone; ?Kalkschieferzone	Ladinian (Fassanian)	Italy, Switzerland	Carroll & Gaskill, 1985	1200
	29	Neusticosaurus peyeri Sander, 1989	Lower Meride Limestone	Ladinian (Fassanian)	Italy, Switzerland	Sander, 1989a; Rieppel & Lin, 1995	450-550
	30	Neusticosaurus pusillus (Fraas, 1881), Seeley, 1882	Lower Meride Limestone; Hoheneck-Dolomite Lower Keuper; Perledo Member of the Perledo--Varenna Formation	Ladinian (Fassanian)	Germany, Italy, Switzerland	Sander, 1989a; Rieppel & Lin, 1995	400-520
	31	Neusticosaurus staubi (Kuhn-Schnyder, 1959)	Prosanto Formation	Ladinian (Longobardian)	Switzerland	Carroll & Gaskill, 1985; Rieppel, 2000	450-550 (based on new, yet to be described specimens, TMS pers. obs.)
	32	Neusticosaurus toeplitschi (Nopcsa, 1929)	Upper unit of Partnach-Plattenkalk	Ladinian (Longobardian)	Austria	Rieppel, 2000	not enough data
	33	Nothosaurus cymatosauroides Sanz, 1983	Middle sub-unit of Alcover unit	Ladinian (Longobardian)	Spain	Rieppel & Hagdorn, 1998; Rieppel, 2000	not enough data
	34	Nothosaurus edingerae Schultze, 1970	Acrodus-Bank uppermost Gipskeuper, Estheria zone/Palaeoestheria	Ladinian/Carnian (Longobardian/Julian)	Germany	Rieppel, 2000	not enough data
	35	Nothosaurus giganteus Münster, 1834	lower Meissner Formation, upper Muschelkalk; Besano Formation	Anisian (Illyrian)	Europe/ northern Gondwana?	Peyer, 1939; Rieppel, 2000; Rieppel et al., 1999	3850 (PIMUZ T4829 holotype of "Paranothosaurus amsleri"; note that ca. last 30 cm of tail are reconstructred)
	36	Nothosaurus haasi Rieppel, Mazin & Tchernov, 1997	Lower Member of the Saharonim Formation	Anisian/Ladinian (Illyrian/Fassanian)	Israel	Rieppel, 2000; Rieppel et al., 1999	not enough data
	37	Nothosaurus jagisteus Rieppel, 2001	Upper Muschelkalk	Ladinian (Fassanian)	Germany	Rieppel, 2001a	920 (skull and part of vertebral column combined (skeleton from posterior dorsals onward missing)
	38	Nothosaurus juvenilis Edinger, 1921	Upper Muschelkalk, lower Trochitenkalk Formation	Anisian (Illyrian)	Germany	Rieppel, 2000	not enough data
	39	Nothosaurus marchicus Koken, 1893	Lower and middle Muschelkalk, Karlstadt & Jena Formations	Anisian (Aegean)	Germany	Schröder, 1914; Rieppel & Wild, 1996; Rieppel, 2000	not enough data (600 as preserved in MB I. 007.18 in specimen referred to 'Nothosaurus raabi' by Schröder, 1914; tail is missing)
	40	Nothosaurus mirabilis Münster, 1834	Trochitenkalk or Lower Meissner Formation, upper Muschelkalk; lower Keuper	Anisian (Illyrian)	Europe/ northern Gondwana?	Rieppel, 2000	not enough data
	41	Nothosaurus rostellatus Shang, 2006	Member II of the Guanling Formation	Anisian (Pelsonian)	China	Shang, 2006	1020 (as preserved in holotype IVPP V 14294, tail is largely missing)
	42	Nothosaurus tchernovi Haas, 1980	Lower Member of the Saharonim Formation	Anisian/Ladinian (Illyrian/Fassanian)	Israel	Rieppel et al., 1999; Rieppel, 2000	not enough data (note that Haas, 1980 originally referred to the species as "N. tchernowi")
	43	Nothosaurus winkelhorsti Klein & Albers, 2009	Layer 9 Vossenveld Formation, Lower Muschelkalk	Anisian (Bithynian)	The Netherlands	Klein & Albers, 2009	not enough data
	44	Nothosaurus winterswjikensis Albers & Rieppel, 2003	Layer 9 Vossenveld Formation, Lower Muschelkalk	Anisian (Bithynian)	The Netherlands	Albers & Rieppel, 2003	not enough data
	45	Nothosaurus yangjuanensis Jiang, Maisch, Hao, Sun & Sun, 2006	Middle Reptile Bed, Upper Member of Guanling Formation	Anisian (Pelsonian)	China	Jiang et al., 2006b	not enough data
	46	Nothosaurus youngi Li & Rieppel, 2004	Zhuganpo Member of the Falang Formation	Ladinian (Longobardian)	China	Li & Rieppel, 2004	650 (as preserved in holotype IVPP V 13590)
	47	Palatodonta bleekeri Neenan, Klein & Scheyer, 2013	Vossenveld Formation, Lower Muschelkalk	Anisian (Bithynian/Pelsonian)	The Netherlands	Neenan et al., 2013	not enough data
	48	Paraplacodus broilii Peyer, 1931	Besano Formation	Ladinian	Europe	Peyer, 1931c; Kuhn, 1942; Rieppel, 2000	1400 (as preserved, tip of snout missing)
	49	Pararcus diepenbroeki Klein & Scheyer, 2013	Vossenveld Formation, Lower Muschelkalk	Anisian (Bithynian/Pelsonian)	The Netherlands	Klein & Scheyer, 2013	>1350 (estimated by Klein & Scheyer, 2013; holotype specimen strongly disarticulated)
	50	Pistosaurus longaevus Meyer, 1839	Lower Meissner Formation, Upper Muschelkalk	Anisian (Illyrian)	Germany	Geissler, 1895; Rieppel, 2000	2080 (as preserved in specimen SMNS R 4041 of 'Nothosaurus strunzi' shown by Geissler, 1895; skull and much of the tail missing)
	51	Placodus gigas Agassiz, 1833	Recoaro Limestone Formation	Anisian (Bithynian)	Europe	Drevermann, 1933; Rieppel, 2000; Rieppel and Dalla Vecchia, 2001	1350 (as preserved in SMF R 1035, tail largely missing; PIMUZ A/III 760: reconstruction of complete animal with tail ca 2500)
	52	Placodus inexpectatus Jiang, Motani, Hao, Rieppel, Sun, Schmitz & Sun, 2008	Lower Reptile Bed, Upper Member of Guanling Formation	Anisian (Pelsonian)	China	Jiang et al., 2008a	2050
	53	Psephosauriscus mosis (Brotzen, 1956)	Beneckeia beds, Makhtesh Ramon, Negev	Anisian (Bithynian)	Israel	Rieppel, 2000, 2002; Rieppel et al., 1999	not enough data
	54	Psephosauriscus ramonensis Rieppel, 2002	Ceratites bed, Makhtesh Ramon, Negev	Anisian/Ladinian (Illyrian/Fassanian)	Israel	Rieppel, 2002	not enough data
	55	Psephosauriscus sinaiticus (Haas, 1959)	Muschelkalk layers, Araif en Naqa, Sinai Penninsula	Anisian/Ladinian (Illyrian/Fassanian)	Egypt	Rieppel, 2000, 2002	not enough data
	56	Psephosaurus suevicus Fraas, 1896	Erfurt Formation, Lower Keuper (Hohenecker Kalk, Lettenkeuper-Folge)	Ladinian (Longobardian)	Germany	Rieppel, 2000, 2002	not enough data
	57	Qianxisaurus chajiangensis Cheng, Wu, Sato & Shan, 2012	Zhuganpo Member of the Falang Formation	Ladinian (Longobardian)	China	Cheng et al., 2012	760 (as preserved in holotype NMNS-KIKO-F044630, tip of tail is missing; >800 estimated by Cheng et al., 2012)
	58	Sanchiaosaurus dengi Young, 1965	Member I of the Guanling formation	Anisian (Aegean?)	China	Rieppel, 1999; Rieppel, 2000	700 (measured on image)
	59	Serpianosaurus mirigiolensis Rieppel, 1989	Besano Formation	Anisian/Ladinian (Illyrian/Fassanian)	Italy, Switzerland	Rieppel, 1989a; Reppel & Lin, 1995	750
	60	Simosaurus gaillardoti Meyer, 1842	Upper part of upper Muschelkalk; lower Keuper and basal middle Keuper; lower Rio del Lago Formation	Ladinian (Fassanian)	France, Germany, Italy	Rieppel, 1994, 2000	3000-4000
	61	Wumengosaurus delicatomandibularis Jiang, Rieppel, Motani, Hao, Sun, Schmitz & Sun, 2008	Upper member, Member II of the Guanling Formation	Anisian (Pelsonian)	China	Wu et al., 2011, Jiang et al., 2008b	960 (as preserved in IVPP V15314, tip of snout and tip of tail missing)
	62	Yunguisaurus liae Cheng, Sato, Wu and Li, 2006	Zhuganpo Member of the Falang Formation	Ladinian (Longobardian)	China	Sato et al., 2013b	4016 (as preserved in ZMNH M8738, 4200 estimated by Sato et al. 2013 with missing part of tail)
	No.	Thalattosauriformes	Horizon	First Occurrence	Country/Region	Selected Additional References	Maximum length estimates or total size [mm]
	63	Anshunsaurus wushaensis Rieppel, Liu & Li, 2006	Zhuganpo Member of Falang Formation	Ladinian (Longobardian)	China	Rieppel et al., 2006	2600 (as preserved, tip of tail is missing)
	64	Askeptosaurus italicus Nopsca, 1925	Besano Formation	Ladinian (Fassanian)	Italy, Switzerland	Müller, 2005	>3000 (estimate based on large but incomplete specimen T 4832)
	65	Blezingeria ichthyospondylus (Fraas, 1896)	Upper Muschelkalk	Ladinian (Fassanian)	Europe	Müller, 2005	not enough data
	66	Clarazia schinzi Peyer, 1936	Besano Formation	Anisian/Ladinian (Illyrian/Fassanian)	Italy, Switzerland	Peyer, 1936a; Rieppel, 1987	ca. 1000
	67	Hescheleria ruebeli Peyer, 1936	Besano Formation	Anisian/Ladinian (Illyrian/Fassanian)	Italy, Switzerland	Peyer, 1936b; Rieppel, 1987	not enough data
	68	Thalattosaurus borealis Nicholls & Brinkman, 1993	SW side of "T cirque" near Wapiti Lake, Sulphur Mountain Formation	Anisian (Aegean?)	British Columbia, Canada	Nicholls & Brinkman, 1993a; Nicholls 1999	not enough data
	No.	Ichthyopterygia	Horizon	First Occurrence	Country/Region	Selected Additional References	Maximum length estimates or total size [mm]
	69	Mixosaurus panxianensis Jiang, Schmitz, Hao & Sun, 2006	Lower, Middle and Upper Reptile Horizons, Upper Member of the Guanling Formation	Anisian (Pelsonian)	China	Jiang et al., 2006c	728.5 (as preserved in paratype specimen GMPKU-P-1039)
	70	Besanosaurus leptorhynchus Dal Sasso & Pinna, 1996	Besano Formation	Anisian (Illyrian)	Italy, Switzerland	Dal Sasso, 1996; McGowan & Motani, 2003	4330/5410 (varying body size estimates of the same specimen, see Appendix S3)
	71	Cymbospondylus buchseri Sander, 1989	Besano Formation	Anisian (Illyrian)	Italy, Switzerland	Sander, 1989b; McGowan & Motani, 2003	5000
	72	Cymbospondylus nichollsi Fröbisch, Sander & Rieppel, 2006	Upper Part of Fossil Hill Member of the Favret Formation	Anisian (Illyrian)	Nevada, USA	Frobisch et al., 2006	not enough data
	73	Cymbospondylus piscosus Leidy, 1868	Prida Formation	Anisian (Illyrian)	Nevada, USA	Merriam, 1908; McGowan & Motani, 2003	9300
	74	Mixosaurus cornalianus (Bassani, 1886)	Besano Formation	Anisian (Illyrian)	Italy, Switzerland	Brinkmann, 1998a; McGowan & Motani, 2003; Schmitz et al., 2004	980 (based on Mixosaurus cf. M. cornalianus PIMUZ T4848); 830 (PIMUZ T 4376)
	75	Mixosaurus kuhnschnyderi (Brinkmann, 1998)	Besano Formation	Anisian (Illyrian)	Italy, Switzerland	Brinkmann, 1998b; McGowan & Motani, 2003	not enough data
	76	Omphalosaurus nevadanus Merriam, 1906	Fossil Hill Member of the Favret Formation	Anisian (Illyrian)	Nevada, USA	Motani, 2000	not enough data
	77	Omphalosaurus wolfi Tichy, 1995	Lercheck Limestone	Ladinian (Fassanian)	Germany	Motani, 2000; Sander & Faber, 2003	not enough data
	78	Phalarodon atavus (Quenstedt, 1852)	Muschelkalk	Anisian (Pelsonian)	Germany, Poland, China	Maisch & Matzke, 2000; McGowan & Motani, 2003; Liu et al., 2013	ca. 500 (as preserved in CCCGS LPV 30872, interpreted as a subadult specimen; skeleton partly distorted and posterior part of tail missing)
	79	Phalarodon callawayi Schmitz, Sander, Storrs & Rieppel, 2004	Fossil Hill Member of the Favret Formation, Prida Formation; Sulphur Mountain Formation; Tschermakfjellet Formation	Anisian (Illyrian)	Nevada, USA; British Columbia; Spitzbergen	Schmitz et al., 2004	1500 (estimate given by Schmitz et al., 2004 on CMC VP 7275)
	80	Phalarodon fraasi Merriam, 1910	Fossil Hill Member of the Prida Formation; Upper Saurian Niveau Tschermakfjellet Formation; Whistler/Lama member of the Sulphur Mountain Formation, Upper Member of Guanling Formation	Anisian (Pelsonian)	Nevada, USA; British Columbia; Spitzbergen; China	Nicholls et al., 1999; Schmitz et al., 2004; Schmitz, 2005; Jiang et al., 2007	2800 (estimate given by Schmitz et al., 2004 on CMC VP 7276, at that time referred to as 'Mixosaurus nordenskioeldii')
	81	Phantomasaurus neubigi (Sander, 1997)	Lower upper Muschelkalk	Anisian (Illyrian)	Germany	Maisch & Matzke, 2000; McGowan & Motani, 2003	ca. 3000 (estimate given by Sander, 1987)
	82	Tholodus schmidi Meyer, 1851	Jena Formation, Upper Lower Muschelkalk	Anisian (Pelsonian)	Germany, Italy, Poland	McGowan & Motani, 2003; Dalla Vecchia, 2004	not enough data
	83	Xinminosaurus catactes Jiang, Motani, Hao, Schmitz, Rieppel, Sun & Sun, 2008	Lower Reptile Bed, Upper Member of the Guanling Formation	Anisian (Pelsonian)	China	Jiang et al., 2008c	2320
	84	Thalattoarchon saurophagis Fröbisch, Fröbisch, Sander, Schmitz & Rieppel, 2013	Fossil Hill Member of the Favret Formation	Anisian (Pelsonian)	Nevada, USA	Fröbisch et al., 2013	8600 (estimate given by Fröbisch et al., 2013)
	No.	Protorosauria / Archosauria	Formation	First Occurrence	Country/Region	Selected Additional References	Maximum length estimates or total size [mm]
	85	Dinocephalosaurus orientalis Li, 2003	Upper Reptile Bed, Upper member of the Guanling Formation	Anisian (Pelsonian)	China	Li et al., 2004; Rieppel et al., 2008	2700 (as preserved in holotype; up to 3500 according to Rieppel et al., 2008)
	86	Protanystropheus antiquus (Huene, 1905)	Gogolin beds of the lower Muschelkalk	Anisian (Aegean)	Poland	Sennikov, 2011	not enough data
	87	Qianosuchus mixtus Li, Wu, Cheng, Sato & Wang, 2006	Middle Reptile Horizon, Upper Member, Guanling Formation	Anisian (Pelsonian)	China	Li et al., 2006	>3000 (estimated by Li et al., 2006)
	88	Tanystropheus conspicuus Meyer, 1852	Muschelkalk	Anisian	Germany	Meyer, 1847-55; Nossoti, 2007	not enough data
	89	Tanystropheus haasi Rieppel, 2001	Levantina level, Middle Member, Gevanim Formation	Anisian (Pelsonian)	Israel	Rieppel, 2001b	not enough data
	90	Tanystropheus longobardicus Bassani, 1886	Besano Formation; Cassina beds, lower Meridekalk; Zhuganpo Member of the Falang Formation	Anisian/Ladinian (Illyrian/Fassanian/Longobardian)	Europe and China	Wild, 1974; Nossoti, 2007; Rieppel et al., 2010	4200 (as preserved, tail is largely disarticulated and partly missing)
	No.	Neodiapsida indet.	Horizon	First Occurrence	Country/Region	Selected Additional References	Maximum length estimates or total size [mm]
	91	Eusaurosphargis dalsassoi Nosotti & Rieppel, 2003	Besano Formation	Anisian/Ladinian (Illyrian/Fassanian)	Italy	Nosotti & Rieppel, 2003	not enough data, too disarticulate
	92	Helveticosaurus zollingeri Peyer, 1955	Cava Tre Fontane, Besano Formation	Anisian/Ladinian (Illyrian/Fassanian)	Italy, Switzerland	Rieppel, 1989b	ca. 2000 (estimate given in Rieppel, 1989b)
	93	Saurosphargis' voltzi Huene, 1936	Gogolin beds, lower Muschelkalk	Anisian (Aegean)	Poland	Nosotti & Rieppel, 2003; Li et al., 2013	not enough data
	94	Sinosaurosphargis yunguiensis Li, Rieppel, Wu, Zhao & Wang, 2011	Member II of the Guangling Formation	Anisian (Pelsonian)	China	Li et al., 2011	not enough data (ca. 670 preserved in holotype)
	95	Largocephalosaurus qianensis Li, Jiang, Cheng, Wu & Rieppel, 2013	Member II of the Guangling Formation	Anisian (Pelsonian)	China	Li et al., 2013	2320 (as preserved, based on holotype IVPP V 15638)
				First Occurrence

## Sheet: Tabelle3
	Appendix S3. Xcel-spreadsheet with data used for the humeral proximodistal length-body length relation in Triassic ichthyosaurs (Fig. 3).
	Ichthyosaur taxon	Body length [cm]	Humerus length [cm]	Age	Data from	Further Information
	New Bear Lake specimen	1100	28	Spathian, Early Triassic	this study	body size inferred from graph
	Chaohusaurus geishanensis	74	2	Spathian, Early Triassic	McGowan & Motani, 2003	body size estimation for reconstruction based on several individuals
	Utatsusaurus hataii	260	7	Upper Spathian, Early Triassic	Motani et al., 1998	body size estimation for reconstruction based on several individuals
	Xinminosaurus catactes (GMPKU-P-1071)	232	7	Anisian, Middle Triassic	Jiang et al., 2008	size estimations from text, p. 1317
	Cymbospondylus piscosus (UCMP 9950)	930	32.5	Anisian, Middle Triassic	Merriam, 1908	size estimations from text, p. 122; posterior part of tail missing; see also Fröbisch et al., 2013
	Mixosaurus sp. (PIMUZ T77)	50	1.4	Anisian-Ladinian, Middle Triassic	Kolb et al., 2011	body length esimated as tail is partly broken off
	Mixosaurus cf. cornalianus (PIMUZ T4848)	98	3	Anisian-Ladinian, Middle Triassic	Brinkmann, 2004; this study	body size measurement taken from table 1 in Brinkmann, 2004
	Mixosaurus sp. (PIMUZ T4858b)	80.2	2.5	Anisian-Ladinian, Middle Triassic	Brinkmann, 2004; this study	body size measurement taken from table 1 in Brinkmann, 2004
	Besanosaurus leptorhynchus (BES SC 999)	541	9.6	Anisian-Ladinian, Middle Triassic	Dal Sasso & Pinna, 1996	body size esitmation given in table, p. 9; indicated by (A) in plot
	Besanosaurus leptorhynchus (BES SC 999)	433	9.7	Anisian-Ladinian, Middle Triassic	Dal Sasso & Pinna, 1996	measured from fig. 8, p. 8; indicated by (B) in plot
	Cymbospondylus buchseri (PIMUZ T 4351)	500	14	Anisian-Ladinian, Middle Triassic	Sander, 1989	body size esimation between 5 and 5.5 meters was given in text, p.164
	Shastasaurus liangae (GMR 014)	644	16.5	Lower Carnian, Late Triassic	Yin in Yin et al., 2000	measurements taken from text, p. 19; but see discussion in Sander et al., 2011
	Shastasaurus liangae (YIGMR SPCV03107)	700	15.6	Lower Carnian, Late Triassic	Sander et al., 2011	body size estimation taken from text, p. 3; humerus length based on fig. 4, p. 6
	Guizhouichthyosaurus tangae (IVPP V 11853)	530	14.5	Carnian, Late Triassic	Shang & Li, 2009	measurements based on figs. 2 and 3
	Guizhouichthyosaurus tangae (YIGMR TR00001)	540	14.5	Carnian, Late Triassic	Cheng et al., 2006; Wang et al., 2008	measured from fig.1 (Cheng et al., 2006) and fig. 14 (Wang et al., 2008) respectively
	Shonisaurus popularis	1360	34	Upper Carnian, Late Triassic	Kosch, 1990	body size estimation for reconstruction based on several individuals
	Shastasaurus sikanniensis (TMP 94.378.2)	2100	54.5	Norian, Late Triassic	Nicholls & Manabe, 2004	size estimations from text, p. 847
	Temnodontosaurus burgundiae (SMNS 15950)	786	21.5	Early Jurassic	McGowan, 1996	size estimations from fig. 2, p. 1013 and table 2, p. 1015
